# Supplementary material for: Nicotinamide Riboside Supplementation to Suckling Male Mice Improves Lipid and Energy Metabolism in Skeletal Muscle and Liver in Adulthood
Source: MDPI journal article supplement (doi:10.3390/nu14112259), 2022-05-28
Supplement: s1 [file s1]

**Supplementary material: Nicotinamide riboside supplementation to suckling male mice improves lipid and energy metabolism in skeletal muscle and liver in adulthood** by Alba Serrano, Andreu Palou, M. Luisa Bonet, Joan Ribot

**Supplementary Table S1.** Early-life nicotinamide riboside (NR) treatment attenuated high-fat (HF) diet-induced body fat accumulation and energy efficiency in adulthood despite higher food intake.

|                            | control       |                            | NR            |                         | ANOVA |
|----------------------------|---------------|----------------------------|---------------|-------------------------|-------|
|                            | NF            | HF                         | NF            | HF                      |       |
| Body weight (g)            | 44.6 ± 1.2    | 52.7 ± 2.6 <sup>#</sup>    | 45.0 ± 1.9    | 52.3 ± 1.9 <sup>#</sup> | D     |
| Inguinal WAT (g)           | 0.685 ± 0.092 | 1.10 ± 0.13 <sup>#</sup>   | 0.672 ± 0.044 | 1.04 ± 0.12             | D     |
| Epididymal WAT (g)         | 1.30 ± 0.22   | 2.08 ± 0.23 <sup>#</sup>   | 1.27 ± 0.16   | 2.13 ± 0.43             | D     |
| Retroperitoneal WAT (g)    | 0.295 ± 0.037 | 0.506 ± 0.053 <sup>#</sup> | 0.328 ± 0.041 | 0.485 ± 0.095           | D     |
| Adipose index (%)          | 5.04 ± 0.59   | 7.03 ± 0.61 <sup>#</sup>   | 5.00 ± 0.35   | 6.82 ± 1.18             | D     |
| Energy intake (kcal/mice)  | 1,176 ± 44    | 1,237 ± 36                 | 1,146 ± 34    | 1,394 ± 73 <sup>#</sup> | D     |
| Energy efficiency (g/Mcal) | 0.658 ± 0.357 | 4.45 ± 0.131 <sup>#</sup>  | 0.011 ± 1.250 | 4.93 ± 1.49             | D     |

Newborn male mice received NR or vehicle (water; control) from day 2 to 20 of age, were weaned onto a chow diet on day 21, and were assigned to either a HF or a normal-fat (NF) diet on day 90, for 10 weeks. Body and white adipose tissue (WAT) pad weights, and adiposity index (combined mass of all fat pads taken expressed as a percentage of body weight) at the end of the experiment, data are the mean±SEM of n=5-6 animals per group. Cumulative food intake and energy efficiency (body weight gained per calories consumed) are calculated on a per-cage basis and are the mean±SEM of 2-3 cages per group (2-3 animals per cage) along with HF diet challenge. Statistics (P<0.05): D diet effect (two-way ANOVA); <sup>#</sup> HF vs NF (t-Student).

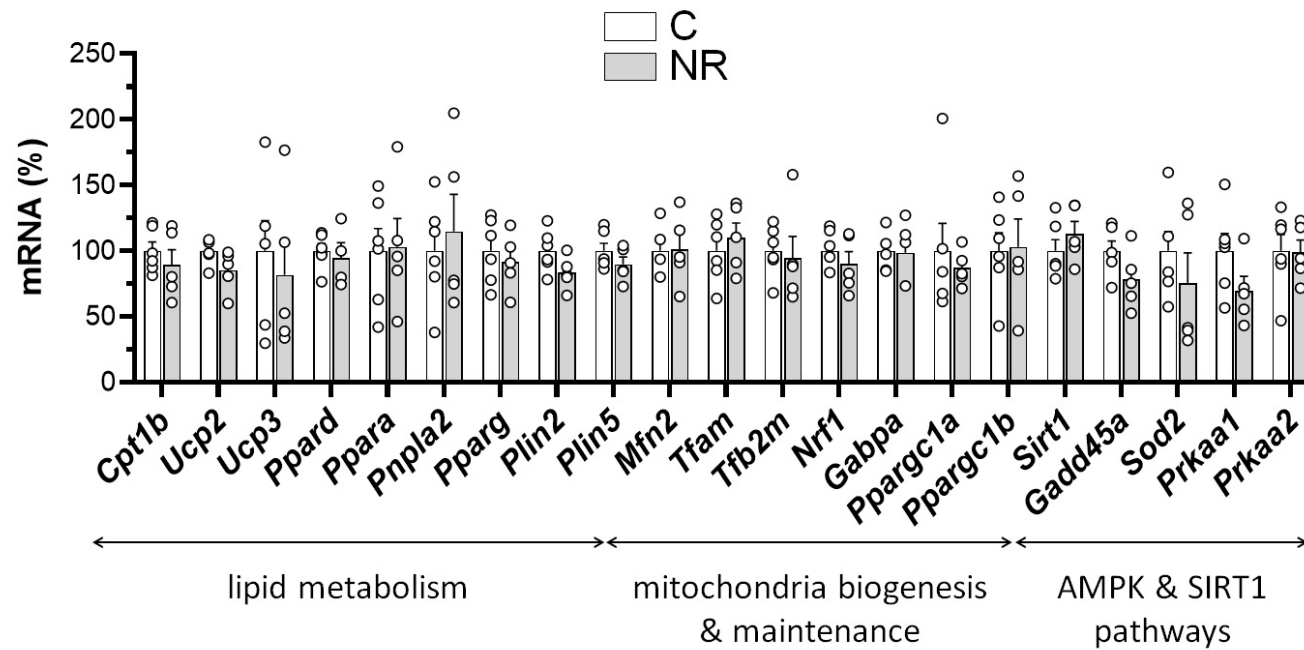

**Supplementary Figure S1.** Early-life nicotinamide riboside (NR) treatment did not significantly affect lipid metabolism capacities and mitochondria pathways in skeletal muscle of mice at a young age. Newborn male mice received NR or vehicle (water; control) from day 2 to 20 of age and were weaned onto a chow diet on day 21. mRNA levels of the indicated genes were analyzed in *Gastrocnemius* skeletal muscle at age of 35 days. Data are the mean±SEM of 5-6 animals per group and are expressed relative to the mean value of the control group, which was set to 100. Circles correspond to individual data.

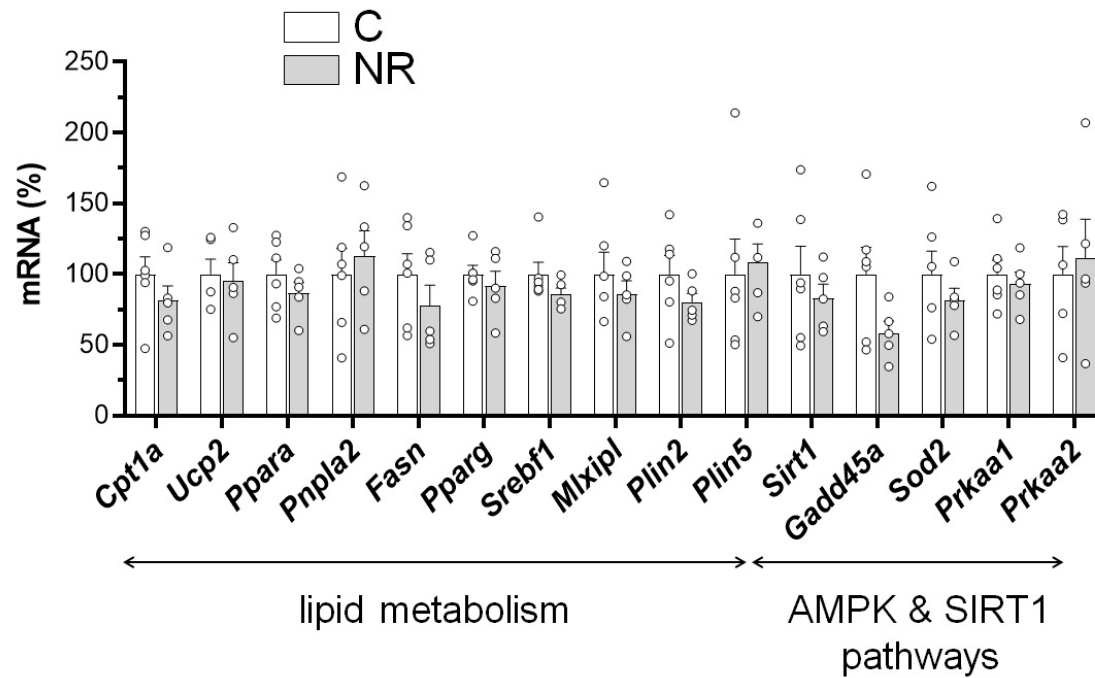

**Supplementary Figure S2.** Early-life nicotinamide riboside (NR) treatment did not significantly affect lipid metabolism capacities in liver of mice at a young age. Newborn male mice received NR or vehicle (water; control) from day 2 to 20 of age and were weaned onto a chow diet on day 21. mRNA levels of the indicated genes were analyzed in liver at age of 35 days. Data are the mean±SEM of 5-6 animals per group and are expressed relative to the mean value of the control group, which was set to 100. Circles correspond to individual data.

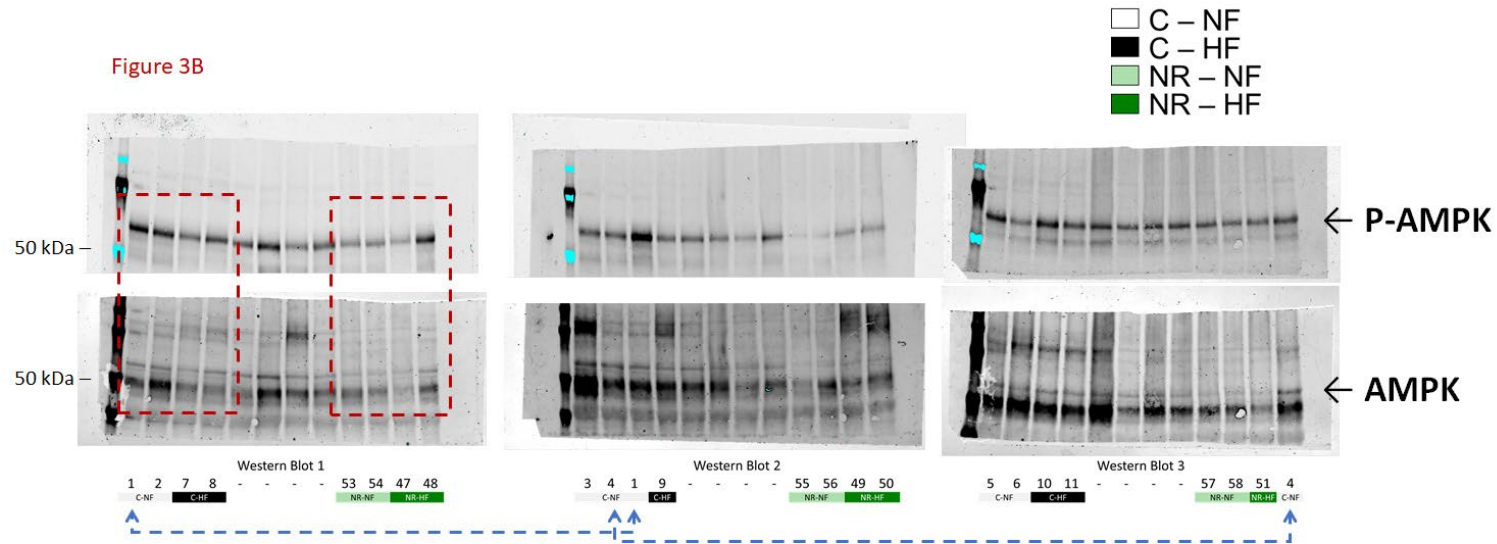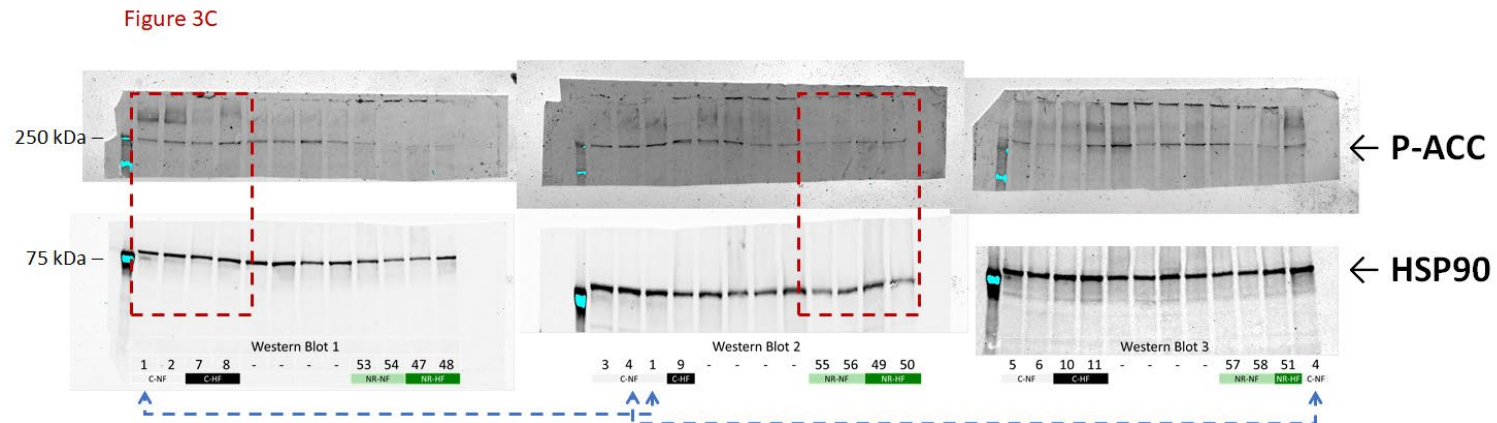

**Supplementary Figure S3.** Original images supporting western blot results shown in the histograms in Figure 3 panels B and C. All independent biological replicates used in the analysis are included (5-6 animals per group). Red boxes correspond to the cropped images used for illustration in Figure 3. Blue lines connect the technical replicates used to compare membranes with each other.
